# Supplementary material for: Fe3O4@porous carbon hybrid as the anode material for a lithium-ion battery: performance optimization by composition and microstructure tailoring
Source: Royal Society of Chemistry journal article supplement (doi:10.1039/c5nj00032g), 2015-01-01
Supplement: c5nj00032g1.pdf [file c5nj00032g1.pdf]

**Electronic Supplementary Material (ESI) for New Journal of Chemistry.**

**Fe<sub>3</sub>O<sub>4</sub>@porous carbon hybrid as anode materials for lithium-ion battery:**

**Performances optimization by composition and microstructure tailoring**

Xiuling Zhang <sup>a</sup>, Zhongbo Hu <sup>a</sup>, Xiaoling Xiao <sup>a</sup>, Limei Sun <sup>b</sup>, Songbai Han <sup>b</sup>, Dongfeng Chen <sup>b\*</sup>, Xiangfeng Liu <sup>a\*</sup>,

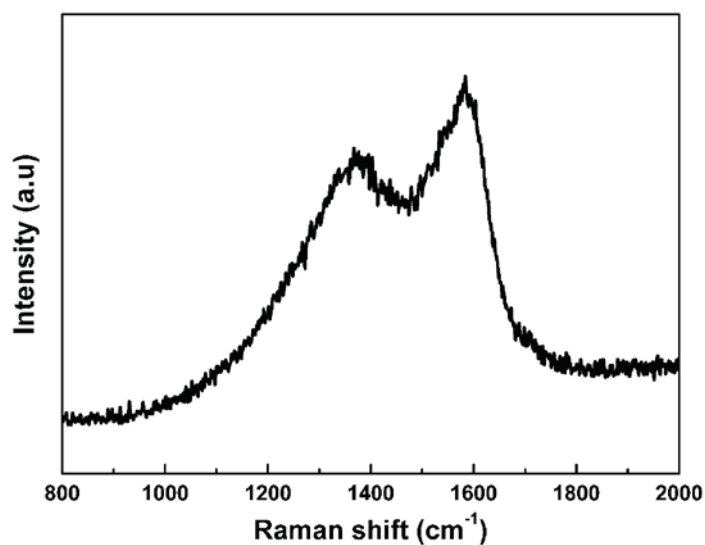

**Fig. S1** Raman spectrum of Fe<sub>3</sub>O<sub>4</sub>@C-2 composite.

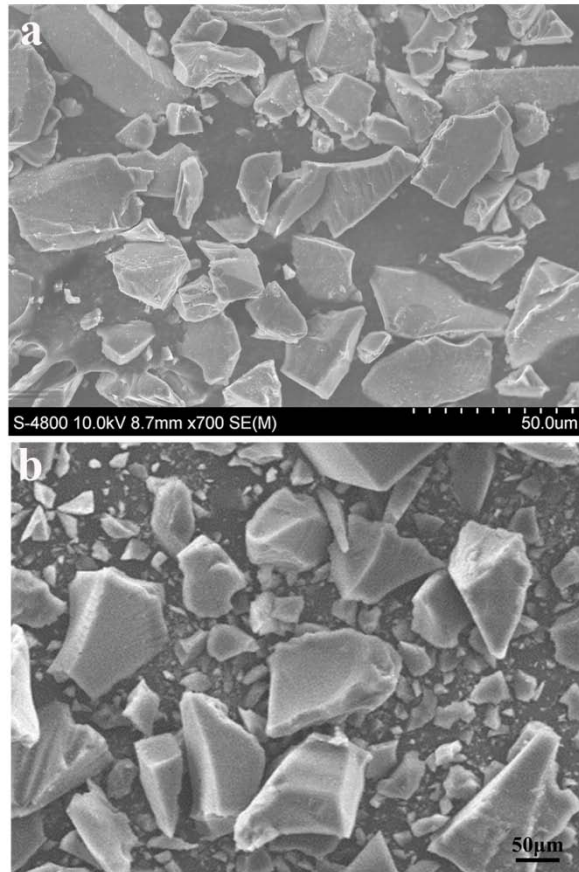

**Fig. S2** SEM images of Fe<sub>3</sub>O<sub>4</sub>@C-1 (a) and bimodal mesoporous carbon (BMC) (b).
